# Supplementary figures and images for: A ketogenic diet as a potential novel therapeutic intervention in amyotrophic lateral sclerosis
Source: Springer Nature journal article supplement (doi:10.1186/1471-2202-7-29), 2006-04-03

**A**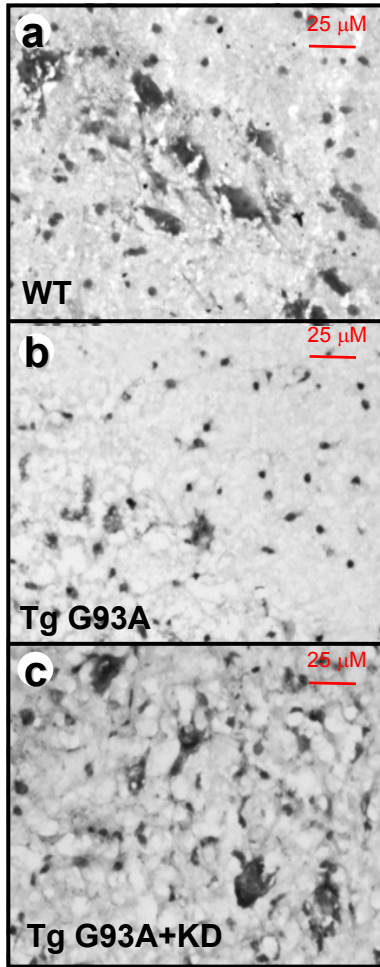**B**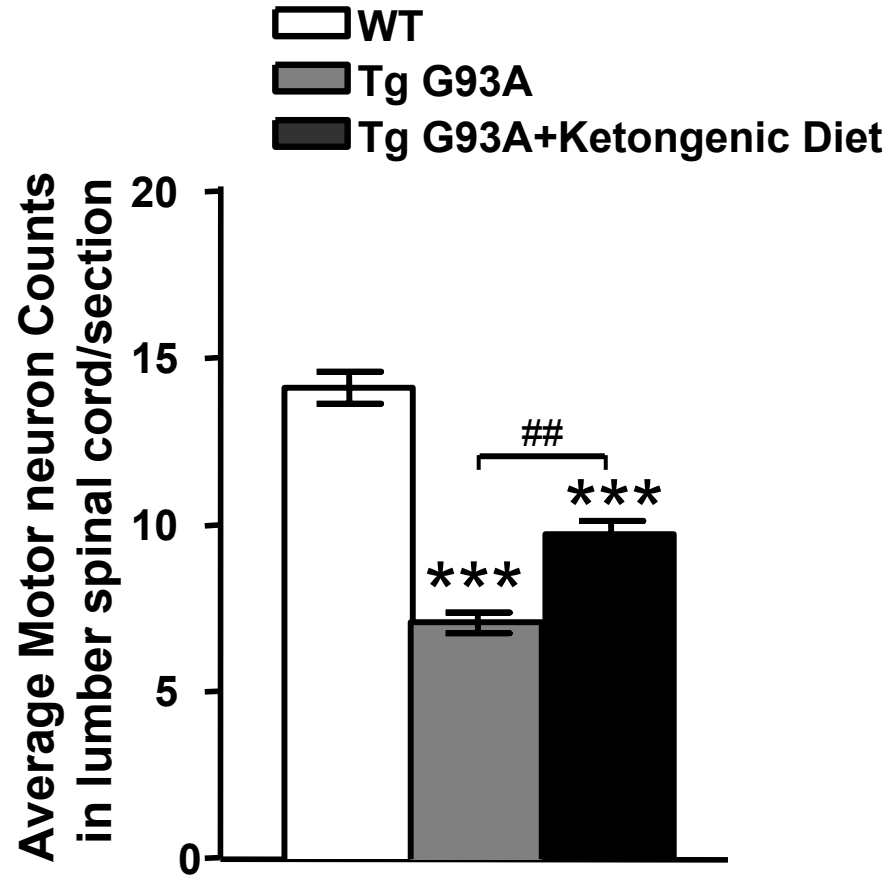

Supplement: 12868_2005_234_MOESM2_ESM.pdf [file 12868_2005_234_MOESM2_ESM.pdf]
